# Supplementary material
Source: PubMed Central journal article supplement (PMC1149398)

a

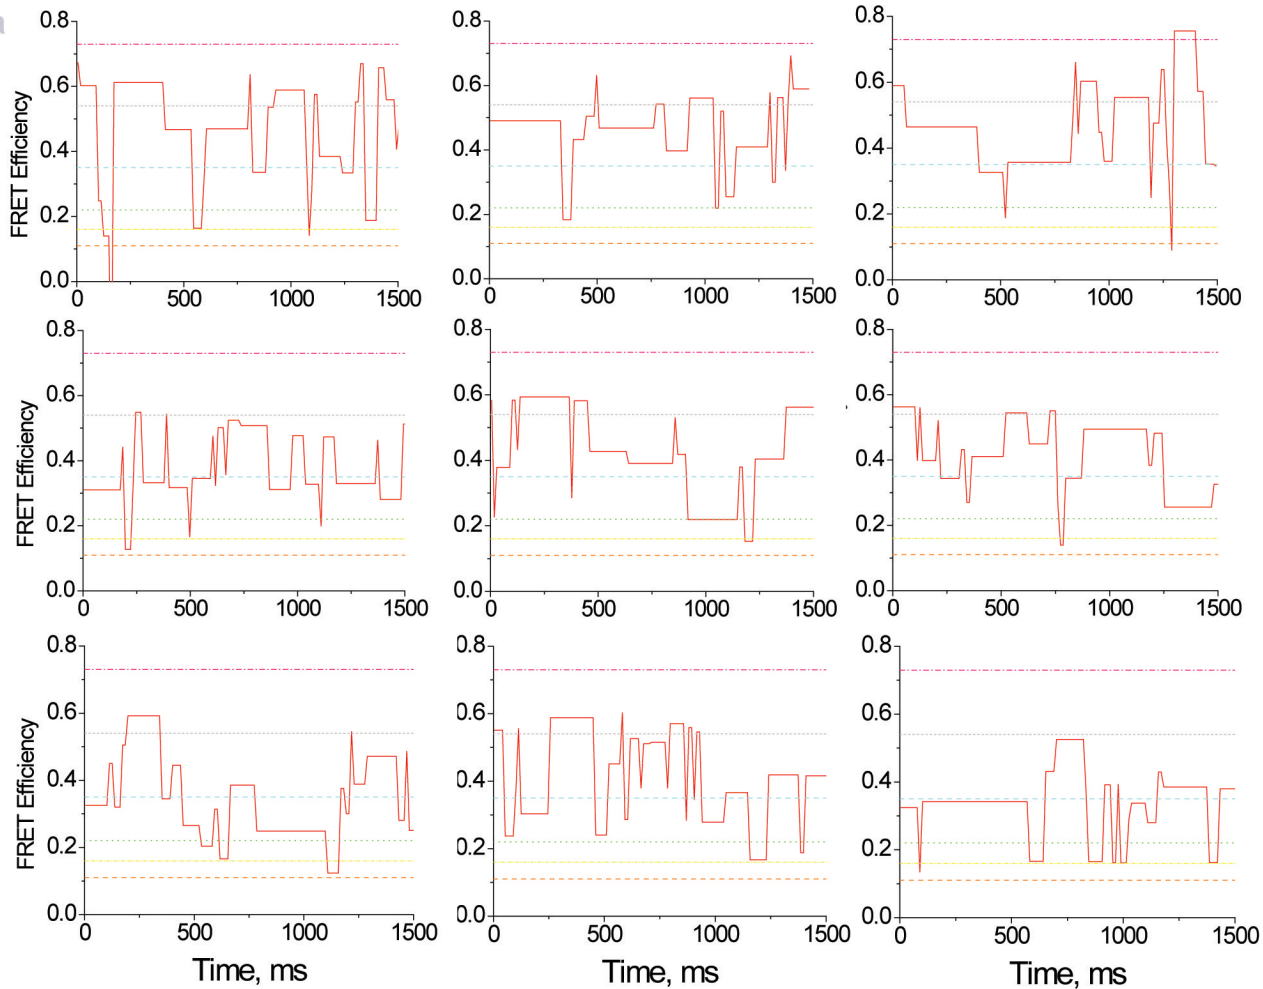

Number of occurrences

$\sigma$

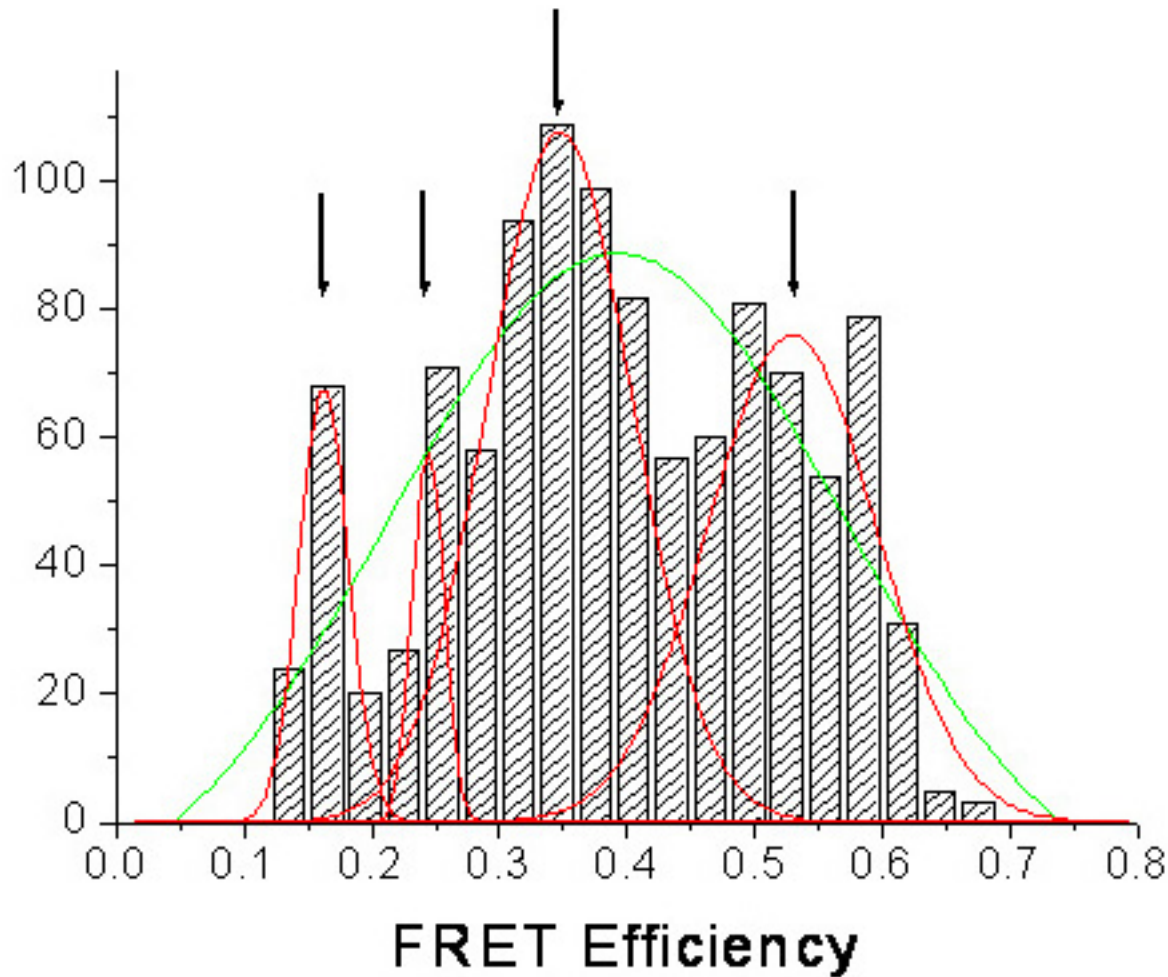

c

Number of occurrences

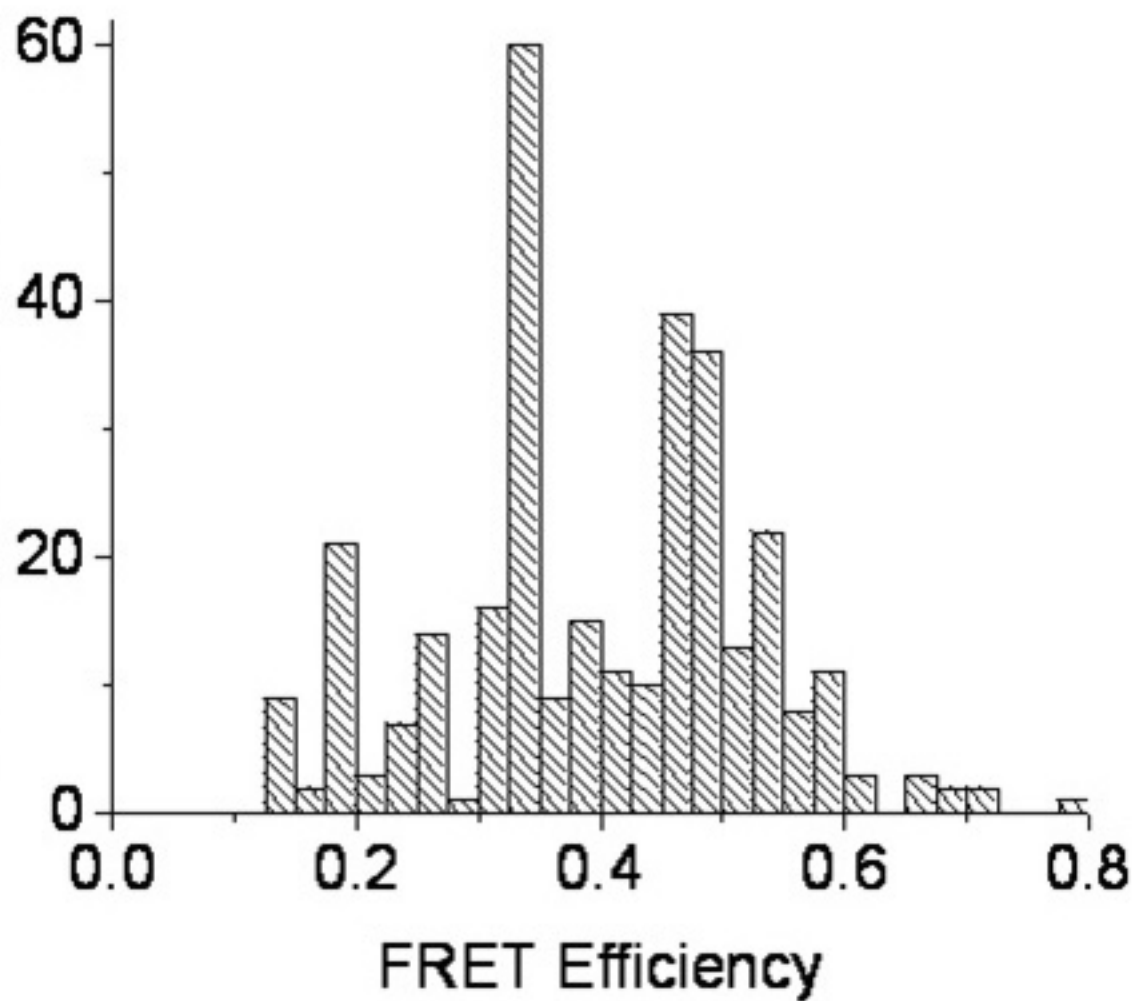

Supplement: pnas_0407210102_2.pdf [file pnas_0407210102_2.pdf]
